# Supplementary material for: Gene Expression Classification of Colon Cancer into Molecular Subtypes: Characterization, Validation, and Prognostic Value
Source: PubMed Central journal article supplement (PMC3660251; doi:10.1371/journal.pmed.1001453), 2013-05-21
Supplement: pmed.1001453.s001.pdf [file pmed.1001453.s001.pdf]

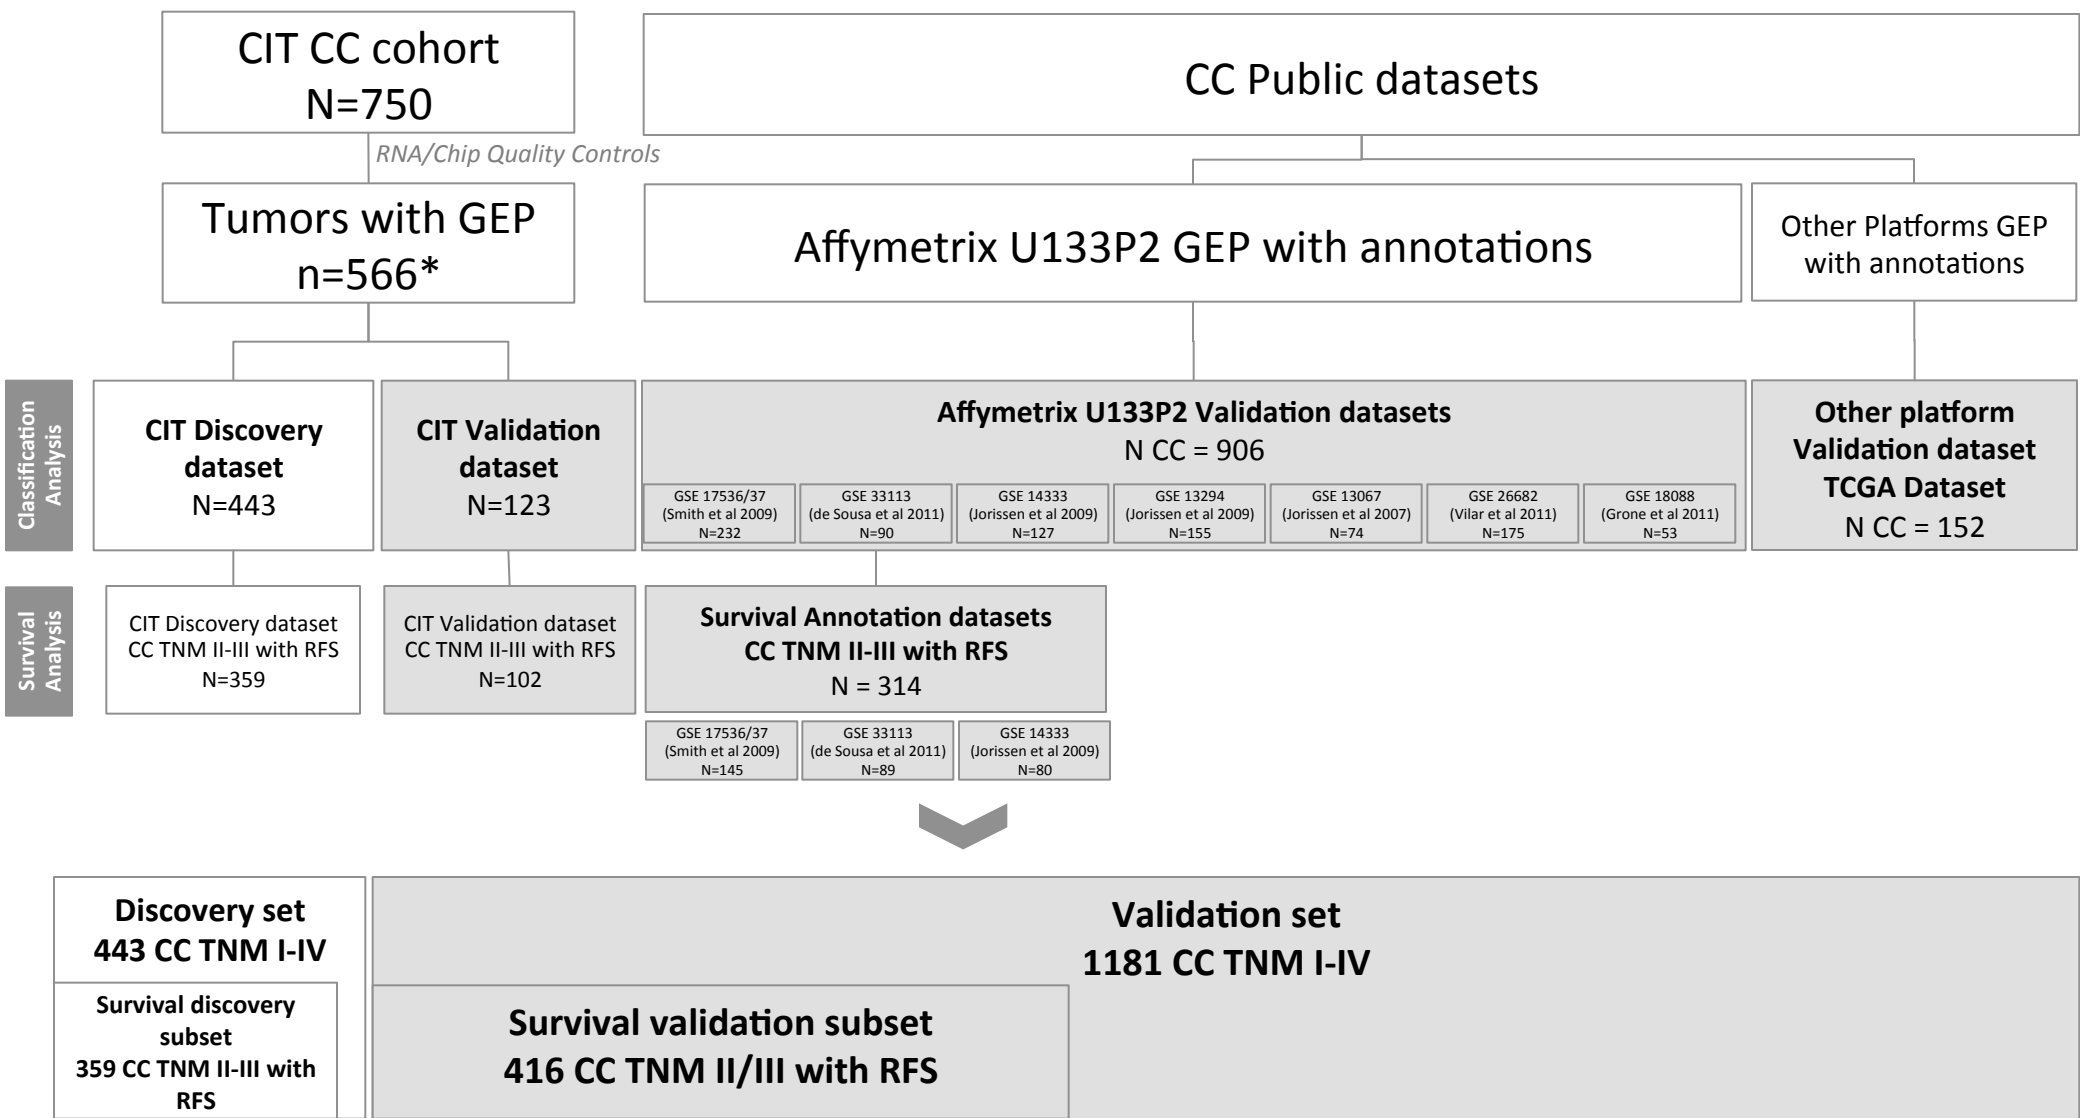

Figure S1
