# Supplementary material for: Gene Expression Classification of Colon Cancer into Molecular Subtypes: Characterization, Validation, and Prognostic Value
Source: PubMed Central journal article supplement (PMC3660251; doi:10.1371/journal.pmed.1001453), 2013-05-21
Supplement: pmed.1001453.s003.pdf [file pmed.1001453.s003.pdf]

## A Affymetrix Discovery set

| CIT CCMST                        |         | C2 (n=83) | C4 (n=46) | C3 (n=56) | C6 (n=45) | C5 (n=118) | C1 (n=95) |
|----------------------------------|---------|-----------|-----------|-----------|-----------|------------|-----------|
| dMMR                             | 2.1e-42 | 68%       | 12%       | 7%        | 0%        | 1%         | 1%        |
| CIMP+                            | 1.1e-23 | 59%       | 34%       | 18%       | 3%        | 3%         | 4%        |
| CIN+                             | 1.7e-15 | 44%       | 73%       | 65%       | 83%       | 95%        | 95%       |
| BRAF mut                         | 4.1e-19 | 40%       | 22%       | 6%        | 0%        | 1%         | 0%        |
| KRAS mut                         | 1.1e-12 | 28%       | 50%       | 87%       | 28%       | 27%        | 42%       |
| TP53 mut                         | 7.3e-03 | 41%       | 45%       | 35%       | 59%       | 71%        | 59%       |
| Proximal Location                | 5e-17   | 72%       | 57%       | 59%       | 16%       | 21%        | 26%       |
| TNM 4 vs 1,2,3                   | 5.3e-04 | 5%        | 31%       | 13%       | 2%        | 15%        | 13%       |
| Stem Cell up (Merlos et al)      | 2.1e-16 | 42%       | 91%       | 16%       | 47%       | 65%        | 32%       |
| Crypt Bottom up (Kosinski et al) | 1.7e-33 | 27%       | 96%       | 4%        | 67%       | 33%        | 5%        |
| Normal-like GEP                  | 1.3e-21 | 33%       | 30%       | 11%       | 82%       | 17%        | 7%        |
| BRAFm-like (Popovici et al)      | 7.6e-37 | 69%       | 50%       | 38%       | 2%        | 3%         | 1%        |
| Serrated CRC (Laiho et al)       | 2.9e-15 | 66%       | 74%       | 52%       | 56%       | 24%        | 21%       |

## B Affymetrix Validation set

| CIT CCMST                        |         | C2 (n=218) | C4 (n=74) | C3 (n=149) | C6 (n=81) | C5 (n=257) | C1 (n=250) |
|----------------------------------|---------|------------|-----------|------------|-----------|------------|------------|
| dMMR                             | 1.5e-49 | 80%        | 22%       | 21%        | 16%       | 5%         | 5%         |
| CIMP+                            | 6.5e-05 | 48%        | 11%       | 21%        | 0%        | 6%         | 0%         |
| CIN+                             | 1.3e-07 | 40%        | 67%       | 39%        | 100%      | 97%        | 94%        |
| BRAF mut                         | 1.5e-06 | 33%        | 0%        | 0%         | 0%        | 0%         | 0%         |
| KRAS mut                         | 0.033   | 24%        | 46%       | 68%        | 33%       | 25%        | 38%        |
| TP53 mut                         | 9.5e-06 | 13%        | 60%       | 12%        | 87%       | 66%        | 65%        |
| Proximal Location                | 2.2e-08 | 76%        | 46%       | 62%        | 29%       | 33%        | 36%        |
| TNM 4 vs 1,2,3                   | 0.031   | 6%         | 13%       | 13%        | 16%       | 19%        | 21%        |
| Stem Cell up (Merlos et al)      | 1.1e-25 | 37%        | 88%       | 25%        | 68%       | 64%        | 46%        |
| Crypt Bottom up (Kosinski et al) | 1.8e-14 | 15%        | 50%       | 17%        | 19%       | 14%        | 9%         |
| Normal-like GEP                  | 4.6e-39 | 15%        | 11%       | 20%        | 70%       | 9%         | 9%         |
| BRAFm-like (Popovici et al)      | 2.6e-95 | 77%        | 50%       | 46%        | 10%       | 4%         | 3%         |
| Serrated CRC (Laiho et al)       | 2.1e-50 | 82%        | 62%       | 54%        | 59%       | 28%        | 18%        |

## C TCGA Validation dataset

| CIT CCMST                        |         | C2 (n=36) | C4 (n=7) | C3 (n=20) | C6 (n=6) | C5 (n=38) | C1 (n=45) |
|----------------------------------|---------|-----------|----------|-----------|----------|-----------|-----------|
| dMMR                             | 2.1e-13 | 74%       | 17%      | 18%       | 0%       | 0%        | 0%        |
| CIMP+                            | 2.4e-11 | 61%       | 29%      | 15%       | 0%       | 5%        | 0%        |
| CIN+                             | 5.8e-03 | 14%       | 0%       | 0%        | 100%     | 71%       | 78%       |
| BRAF mut                         | 5.8e-10 | 48%       | 14%      | 5%        | 0%       | 0%        | 0%        |
| KRAS mut                         | 3.8e-03 | 29%       | 57%      | 74%       | 17%      | 29%       | 27%       |
| TP53 mut                         | 0.017   | 35%       | 29%      | 26%       | 67%      | 63%       | 62%       |
| Proximal Location                | 1.2e-05 | 86%       | 57%      | 65%       | 50%      | 42%       | 27%       |
| TNM 4 vs 1,2,3                   | 0.33    | 9%        | 29%      | 10%       | 0%       | 24%       | 16%       |
| Stem Cell up (Merlos et al)      | 1e-06   | 42%       | 86%      | 30%       | 100%     | 76%       | 24%       |
| Crypt Bottom up (Kosinski et al) | 1.3e-08 | 28%       | 71%      | 0%        | 0%       | 3%        | 2%        |
| Normal-like GEP                  | 0.023   | 6%        | 0%       | 0%        | 33%      | 3%        | 4%        |
| BRAFm-like (Popovici et al)      | 7.3e-05 | 25%       | 29%      | 5%        | 0%       | 0%        | 0%        |
| Serrated CRC (Laiho et al)       | 8.6e-09 | 78%       | 86%      | 70%       | 33%      | 18%       | 22%       |

Figure S3
