# Supplementary material for: Gene Expression Classification of Colon Cancer into Molecular Subtypes: Characterization, Validation, and Prognostic Value
Source: PubMed Central journal article supplement (PMC3660251; doi:10.1371/journal.pmed.1001453), 2013-05-21
Supplement: pmed.1001453.s004.pdf [file pmed.1001453.s004.pdf]

**A****Alteration Frequencies**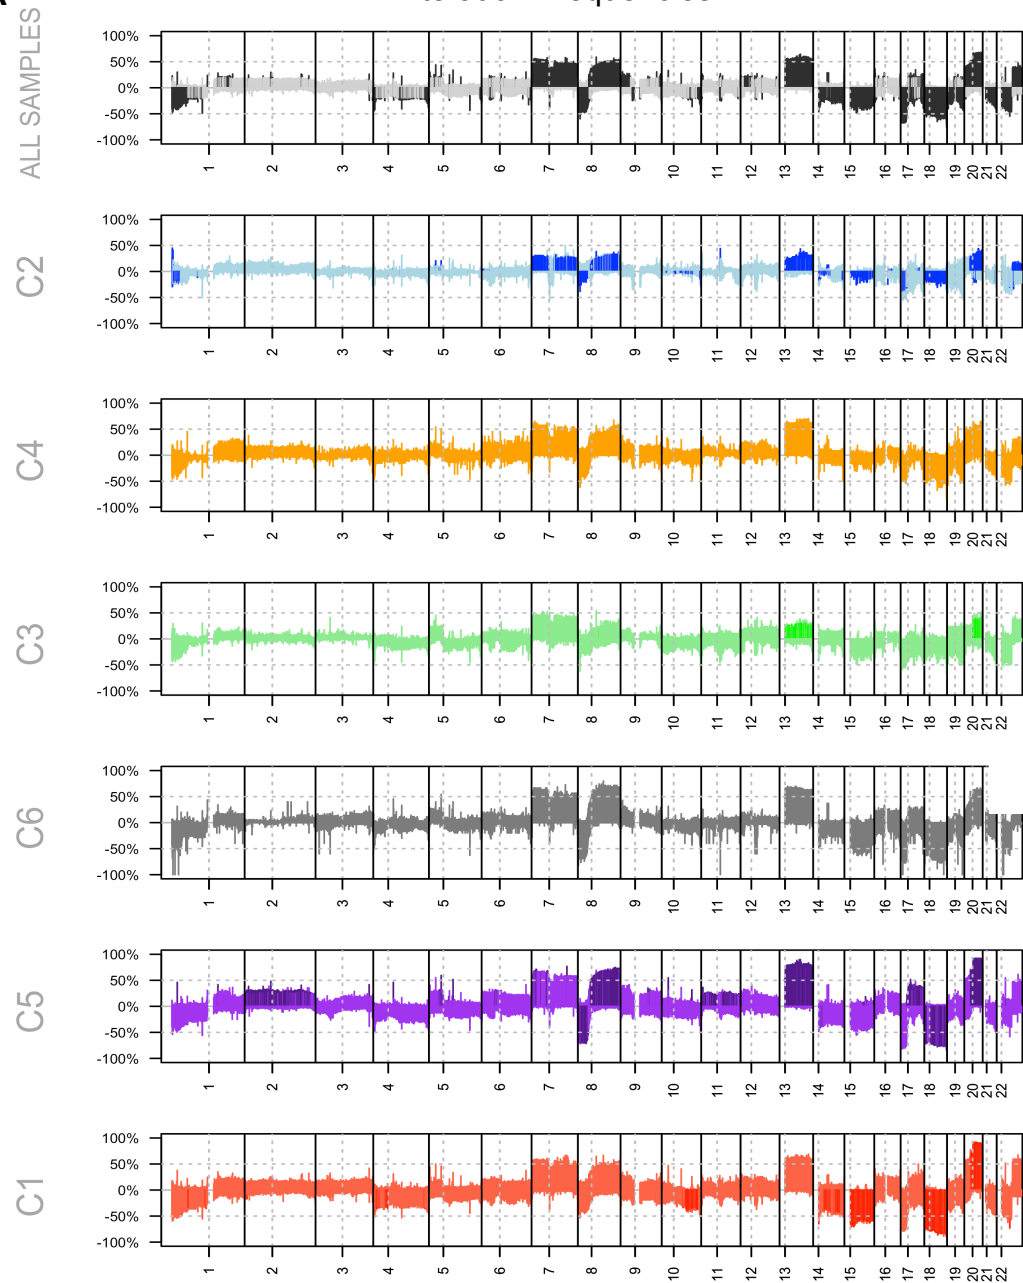**B****Significant alterations**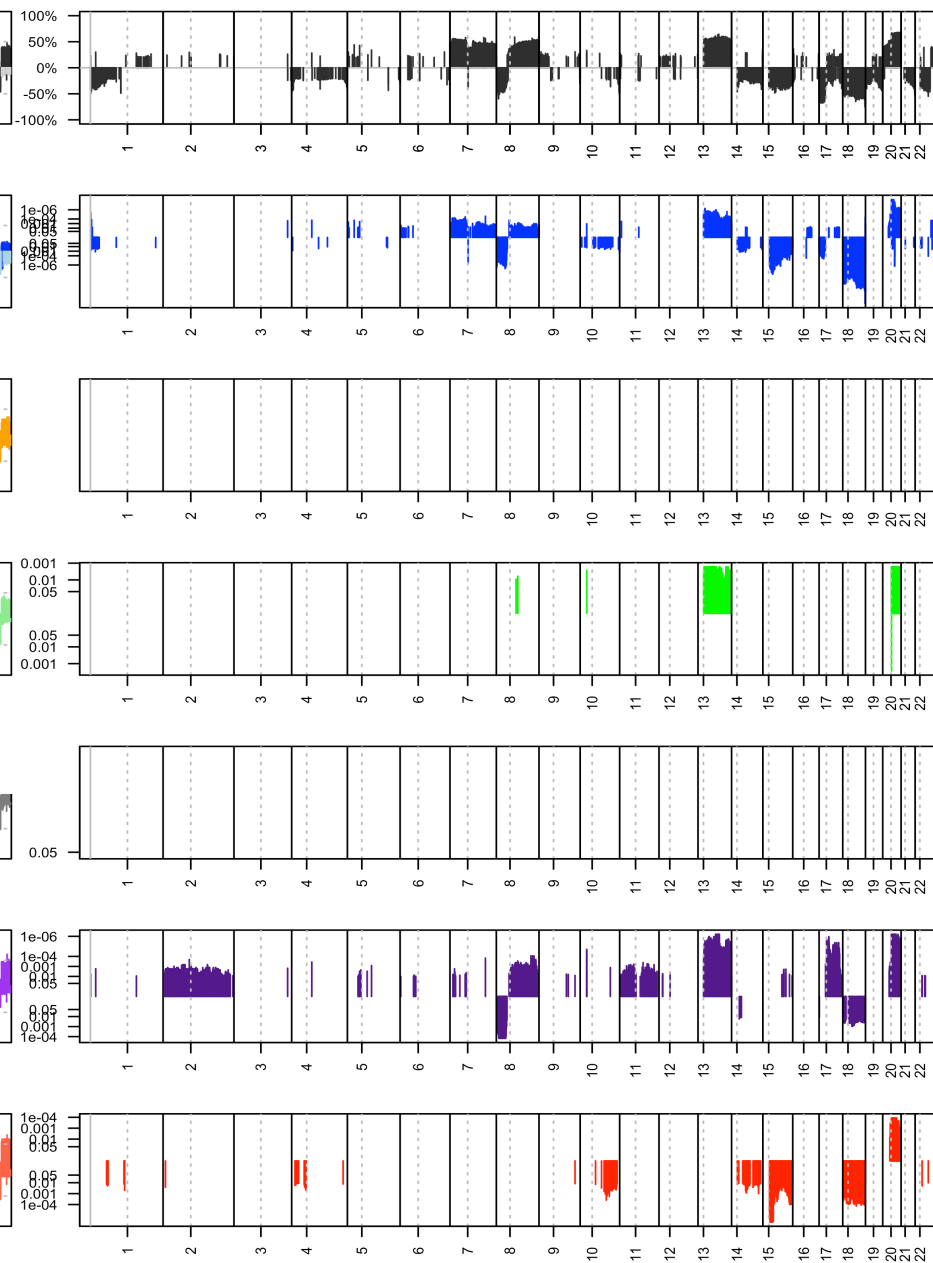**Figure S4**
