# Supplementary material for: Gene Expression Classification of Colon Cancer into Molecular Subtypes: Characterization, Validation, and Prognostic Value
Source: PLoS Med. 2013 May 21;10(5):e1001453. doi: 10.1371/journal.pmed.1001453 (PMC3660251; doi:10.1371/journal.pmed.1001453)
Supplement: Table S4 — Associations of anatomoclinical characteristics, DNA alterations, and supervised signature annotations with the six subtypes based on logistic regression. Associations were assessed by logistic regression using a multinomial logit model (function mlogit, R package mlogit). (XLS) [file pmed.1001453.s012.xls]

## Sheet: Table S4. Asso 6 subtypes (LR)
Table S4. Associations to the six subtypes using Logistic Regression
Variable	Value	C4	C2	C3	C6	C5	C1	Model P value
		OR[95%C.I.]	OR[95%C.I.]	OR[95%C.I.]	OR[95%C.I.]	OR[95%C.I.]	OR[95%C.I.]
MMR Status	dMMR	*	***	.			ref	3e-35
		0.086[9.7e-03-0.76]	5.3e-03[7e-04-0.041]	0.15[0.016-1.4]	3.1e+06[0-Inf]	1.3[0.078-21]
CIMP	CIMP+	***	***	*			ref	6.7e-23
		13[3.6-51]	38[11-130]	5.9[1.5-23]	0.72[0.073-7.2]	0.82[0.16-4.2]
CIN	CIN+	**	***	***	.		ref	1e-15
		0.15[0.045-0.53]	0.045[0.015-0.14]	0.11[0.033-0.35]	0.28[0.073-1.1]	0.98[0.25-3.8]
BRAF	M	**	***			ref		1.4e-18
		28[3.5-230]	67[8.8-500]	6.3[0.64-62]	2.4e-07[0-Inf]		1.1e-07[0-Inf]
KRAS	M		.	***		*	ref	3.1e-13
		1.4[0.66-2.8]	0.54[0.29-1]	8.9[3.6-22]	0.53[0.24-1.2]	0.5[0.28-0.91]
TP53	M		.	*			ref	0.0066
		0.59[0.22-1.6]	0.49[0.22-1.1]	0.39[0.16-0.96]	1[0.41-2.6]	1.7[0.81-3.5]
TNM Stage 4	yes	*	.		.		ref	0.00058
		3.1[1.3-7.5]	0.35[0.11-1.1]	1[0.37-2.8]	0.16[0.02-1.3]	1.2[0.54-2.6]
Tumor Location	proximal	***	***	***			ref	1.6e-17
		3.6[1.7-7.6]	7.3[3.8-14]	4[2-8.1]	0.52[0.2-1.3]	0.75[0.4-1.4]
Stem Cell Up (Merlos et al)	up	***		*	.	***	ref	4.3e-18
		23[7.5-69]	1.6[0.86-2.9]	0.41[0.18-0.96]	1.9[0.92-3.9]	4.1[2.3-7.2]
Crypt Bottom Up (Kosinski et al)	up	***	***		***	***	ref	5.8e-37
		400[74-2.1e+03]	6.5[2.3-18]	0.67[0.12-3.6]	36[12-110]	8.9[3.3-24]
Norm-like GEP	yes	.	*		***	ref	*	5.6e-20
		2.1[0.97-4.7]	2.4[1.2-4.6]	0.59[0.22-1.6]	23[9.2-56]		0.39[0.16-0.97]
BRAFm-like (Popovici et al)	yes	***	***	***			ref	8.4e-40
		94[12-730]	210[27-1.6e+03]	56[7.3-440]	2.1[0.13-35]	3.3[0.36-30]
Serrated CRC (Laiho et al)	yes	***	***	***	***		ref	7.3e-16
		11[4.7-24]	7.4[3.8-14]	4[2-8.3]	4.7[2.2-10]	1.2[0.61-2.2]
Associations were assessed by logistic regression using a multinomial logit model (function mlogit, R package mlogit).
ref : modality used as a reference in the model to compute odds ratios; OR, Odds Ratio; C.I, Confidence Interval.
*** p<0.001	p : modality P value
** p<0.01
* p<0.05
. p<0.1
