# Supplementary material for: Gene Expression Classification of Colon Cancer into Molecular Subtypes: Characterization, Validation, and Prognostic Value
Source: PLoS Med. 2013 May 21;10(5):e1001453. doi: 10.1371/journal.pmed.1001453 (PMC3660251; doi:10.1371/journal.pmed.1001453)
Supplement: Table S7 — Univariate and multivariate Cox analyses including the classification and other molecular annotations. Associations with RFS of the six-subtype classification—including BRAF, KRAS, and TP53 mutations, MMR status, and CIMP status—were assessed by Cox proportional-hazards regression analyses on the discovery set. Univariate Cox analyses were performed on each variable independently. The best multivariate model was determined by using a backward–forward approach to restrict the multivariate model to the most informative variables for the subset of samples for which all the variables were available. The TP53 mutation variable was excluded from the multivariate analysis, as only 201 samples were characterized and as it was not significantly associated to outcome. Value indicates the modality of the annotation associated with the HR. H.R., Cox HR. (XLS) [file pmed.1001453.s015.xls]

## Sheet: Table S7. Cox Mol Markers
Table S7. Univariate and Multivariate Cox Analyses including the classification and other molecular annotations
Discovery dataset	Annotation	Value	UNIVARIATE ANALYSIS						BEST MULTIVARIATE MODEL
			n	n.event	H.R.	95%C.I.	modality	model	n	H.R.	95%C.I.	modality	model
							P value	P value				P value	P value
							(Wald)	(Log-rank)				(Wald)	(Log-rank)
	TNM Stage	-	359	103	1.6	1.1-2.4	0.013	0.0121669
	CIT classification recoded	C4C6	359	103	1.7	1.1-2.6	0.015	0.0136059	264	2.1	1.2-3.4	0.0061	0.0047
	KRAS Mutation	M	340	95	1.5	1-2.3	0.037	0.0356213		1.5	0.95-2.5	0.083
	MMR Status	MSS	327	97	1.8	0.89-3.5	0.1	0.0979895
	CIT classification	C2	359	103	0.73	0.38-1.4	0.35	0.175862
		C3		103	1.1	0.54-2.3	0.77
		C4		103	1.7	0.88-3.4	0.11
		C5		103	0.95	0.53-1.7	0.85
		C6		103	1.4	0.76-2.8	0.26
	CIMP Status	CIMP+	298	75	0.7	0.38-1.3	0.26	0.257122
	BRAF Mutation	M	308	78	0.75	0.35-1.6	0.47	0.469962
	TP53 Mutation	M	201	68	1	0.63-1.7	0.92	0.923045
H.R.: Cox Hazard Ratio, 95% C.I.: 95Percent Confidence Interval of HR. Value : modality of the annotation associated to H.R.
